# Supplementary material
Source: publisher figshare collection journal article supplement (https://karger.figshare.com/ndownloader/files/21887037)
Supplement: Supplementary file 1 [file 21887037]

# Appendix - Supplementary material

**Supplementary figure legend**

**Supplementary figure 1. Kaplan-Meier plot for circuit lifespan in CVVHD-Citrate versus CVVH-Heparin methods.**

All CVVHD-Heparin circuits with less than 625Ui/h (15’000Ui/24h) of heparin are excluded. Median lifespan was 54.9 hours (IQR 44.6) for CVVHD-RCA vs. 21 hours (IQR 35.4) for CVVH-Heparin. P value for log-rank test.
